# Supplementary material for: Diagnosis of COVID-19 in a Dengue-Endemic Area
Source: PubMed Central journal article supplement (PMC7470577; doi:10.4269/ajtmh.20-0676), 2020-08-05
Supplement: tpmd200676.SD1.pdf [file tpmd200676.SD1.pdf]

**Supplemental Table 1. COVID-19 Screening Form Tangerang District Hospital**

Patient's Name : .....  
 Date of birth / Age : .....  
 Address : .....  
 Phone : .....

| No                             | Questions                                                                                                                                                                                                                                                                                      | Yes | No |
|--------------------------------|------------------------------------------------------------------------------------------------------------------------------------------------------------------------------------------------------------------------------------------------------------------------------------------------|-----|----|
| <b>Symptoms</b>                |                                                                                                                                                                                                                                                                                                |     |    |
| 1                              | Fever / fever history                                                                                                                                                                                                                                                                          |     |    |
| 2                              | Signs and symptoms of respiratory disorders: cough, cold/flu, sore throat, etc.                                                                                                                                                                                                                |     |    |
| 3                              | Pneumonia / severe acute respiratory infections (hard to breathe)                                                                                                                                                                                                                              |     |    |
| 4                              | Diarrhea / myalgia                                                                                                                                                                                                                                                                             |     |    |
| 5                              | No other causes based on convincing clinical descriptions                                                                                                                                                                                                                                      |     |    |
| <b>Supporting Examinations</b> |                                                                                                                                                                                                                                                                                                |     |    |
| 1                              | Hemoglobin $\geq$ 10 g%                                                                                                                                                                                                                                                                        |     |    |
| 2                              | Leukopenia                                                                                                                                                                                                                                                                                     |     |    |
| 3                              | Lymphopenia                                                                                                                                                                                                                                                                                    |     |    |
| 4                              | CXR: bilateral and peripheral opacity                                                                                                                                                                                                                                                          |     |    |
| 5                              | CT Scan: ground glass opacities                                                                                                                                                                                                                                                                |     |    |
| <b>Underlying Conditions</b>   |                                                                                                                                                                                                                                                                                                |     |    |
| 1                              | Age >65 years                                                                                                                                                                                                                                                                                  |     |    |
| 2                              | Lung disease: TBC, asthma, Chronic Obstructive Pulmonary Disease (COPD)                                                                                                                                                                                                                        |     |    |
| 3                              | Cardiovascular disease: hypertension, heart disease                                                                                                                                                                                                                                            |     |    |
| 4                              | Diabetes Mellitus (DM)                                                                                                                                                                                                                                                                         |     |    |
| 5                              | Cancer / .....                                                                                                                                                                                                                                                                                 |     |    |
| <b>Risk Factors</b>            |                                                                                                                                                                                                                                                                                                |     |    |
| 1                              | Contact history with confirmed covid-19 cases in the last 14 days?                                                                                                                                                                                                                             |     |    |
| 2                              | Been/travelled abroad where local transmission was occurring in the last 14 days?<br><ul style="list-style-type: none"> <li>○ China</li> <li>○ Italia</li> <li>○ Iran</li> <li>○ Spain</li> <li>○ South Korea</li> <li>○ Germany</li> <li>○ France</li> <li>○ Other. Specify: .....</li> </ul> |     |    |
| 3                              | Travelled domestically where local transmission was occurring in the last 14 days?                                                                                                                                                                                                             |     |    |

|                                                                  |                                                                                                                                                                                                                                                                                    |  |  |
|------------------------------------------------------------------|------------------------------------------------------------------------------------------------------------------------------------------------------------------------------------------------------------------------------------------------------------------------------------|--|--|
|                                                                  | <ul style="list-style-type: none"> <li>○ Jakarta</li> <li>○ Depok</li> <li>○ Bekasi</li> <li>○ Tangerang</li> <li>○ Solo</li> <li>○ Other. Specify: .....</li> </ul>                                                                                                               |  |  |
| <b>Assessment Method</b>                                         |                                                                                                                                                                                                                                                                                    |  |  |
| <b>Patient Under Observation / Pasien Dalam Pengawasan (PDP)</b> | <ul style="list-style-type: none"> <li>- Symptom 1 + 2 + 3 + 4 + 5 and Risk Factor (RF) 1 or 2 or 3</li> <li>- Symptom 1 or 2 or 3 and RF 1</li> <li>- Symptom 1 and/or 2 + Supporting examination 2 + 3</li> <li>- Symptom 1 or 2 or 3 + Supporting examination 4 or 5</li> </ul> |  |  |
| <b>People Under Observation / Orang Dalam Pengawasan (ODP)</b>   | Symptom 1 or 2 or 3 and RF 2 or 3                                                                                                                                                                                                                                                  |  |  |
| <b>Close Contact High Risk</b>                                   | RF 1                                                                                                                                                                                                                                                                               |  |  |
| <b>Follow-Up Plan</b>                                            |                                                                                                                                                                                                                                                                                    |  |  |

Put tick (v) in the appropriate box!

Date : \_\_\_\_\_

Doctor's Signature
