# Supplementary material for: Diagnosis of COVID-19 in a Dengue-Endemic Area
Source: PubMed Central journal article supplement (PMC7470577; doi:10.4269/ajtmh.20-0676), 2020-08-05
Supplement: tpmd200676.SD2.pdf [file tpmd200676.SD2.pdf]

**Supplemental Table 2.** Comparison of signs and symptoms of patients with COVID-19 and dengue

| <b>Clinical signs and symptoms</b>         | <b>COVID-19 (n=42)</b>       | <b>Dengue (n=468)</b>      |
|--------------------------------------------|------------------------------|----------------------------|
| Fever                                      | 37 (88)                      | 468 (100)                  |
| Headache                                   | 13 (31)                      | 261 (56)                   |
| Vomiting                                   | 8 (19)                       | 249 (53)                   |
| Cough                                      | 34 (81)                      | 79 (17)                    |
| Diarrhea                                   | 7 (17)                       | 47 (10)                    |
| <b>Hematology findings: Median (range)</b> |                              |                            |
| Leucocyte count: /mm <sup>3</sup>          | 5,950<br>(1,400-11,300)      | 3,600<br>(800-20,100)      |
| Leukopenia                                 | 5 (12)                       | 312 (67)                   |
| Leukocytosis                               | 3 (7)                        | 9 (2)                      |
| Lymphocyte (%)                             | 25<br>(7-57)                 | 25.5<br>(4-77,8)           |
| Lymphocyte absolute                        | 1,317<br>(476-3,185)         | 888<br>(192-7,104)         |
| Lymphocytopenia                            | 14 (33)                      | 110/414 (27)               |
| Lymphocytosis                              | 3 (7)                        | 84/414 (20)                |
| Platelet count                             | 247,500<br>(100,000-600,000) | 91,900<br>(10,000-452,000) |
| Platelet < 100,000/ mm <sup>3</sup>        | 0 (0)                        | 266 (57)                   |
| Platelet < 150,000/ mm <sup>3</sup>        | 2 (5)                        | 373 (80)                   |

|                                                      |       |          |
|------------------------------------------------------|-------|----------|
| Thrombocytopenia (150,000) AND<br>leukopenia (<5000) | 1 (2) | 318 (68) |
|------------------------------------------------------|-------|----------|
